# Supplementary material
Source: Springer Nature journal article supplement (https://www.springermedizin.de/resource/supplementary/12969_2009_371_MOESM1_ESM.pdf/9592898)

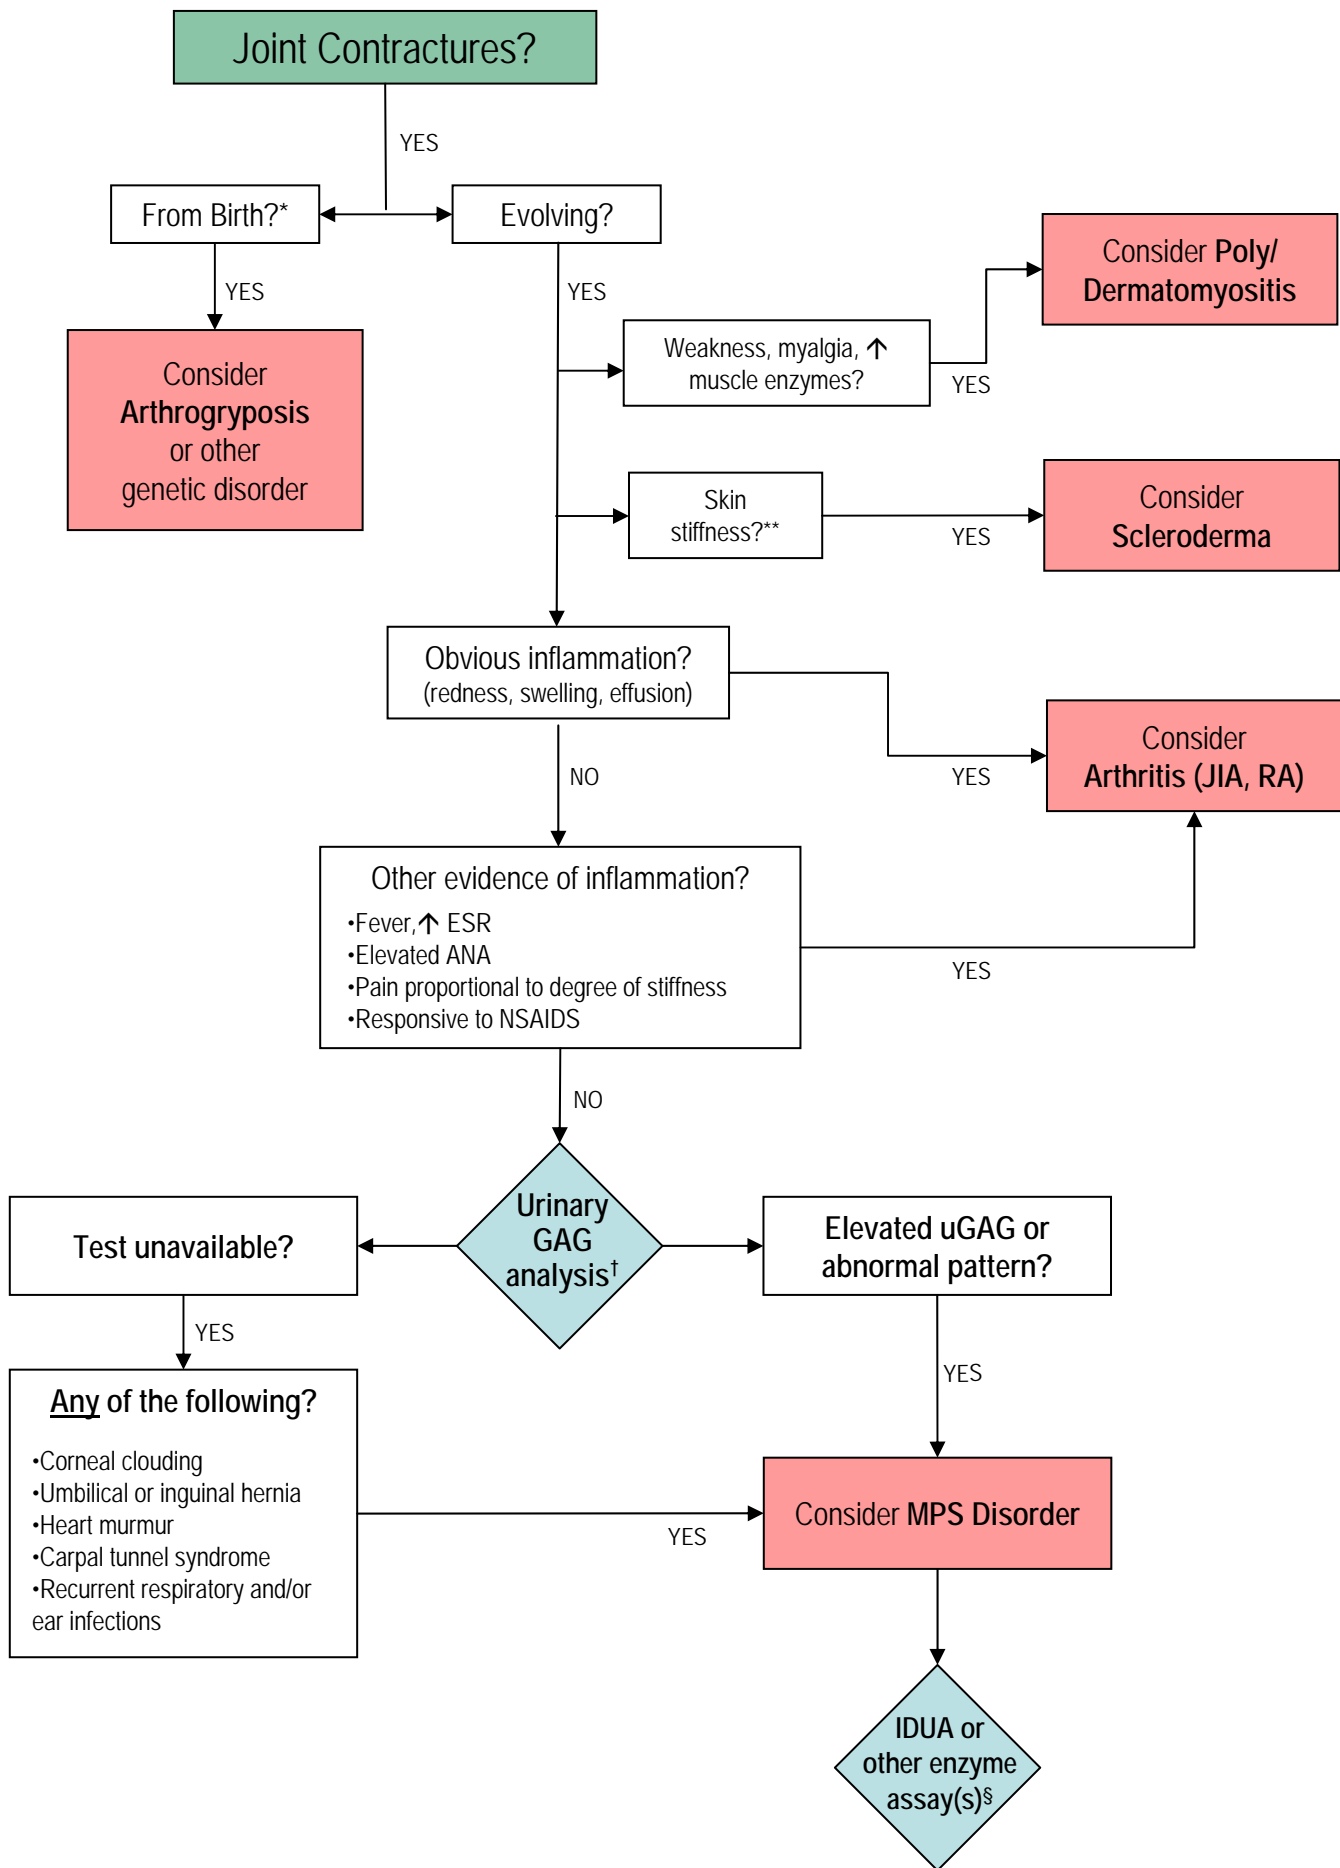

Supplement: MOESM1 [file 9592898]
